# Supplementary material for: Hazardous Effects of SiO2 Nanoparticles on Liver and Kidney Functions, Histopathology Characteristics, and Transcriptomic Responses in Nile Tilapia (Oreochromis niloticus) Juveniles
Source: MDPI journal article supplement (doi:10.3390/biology10030183), 2021-03-02
Supplement: s1 [file s1]

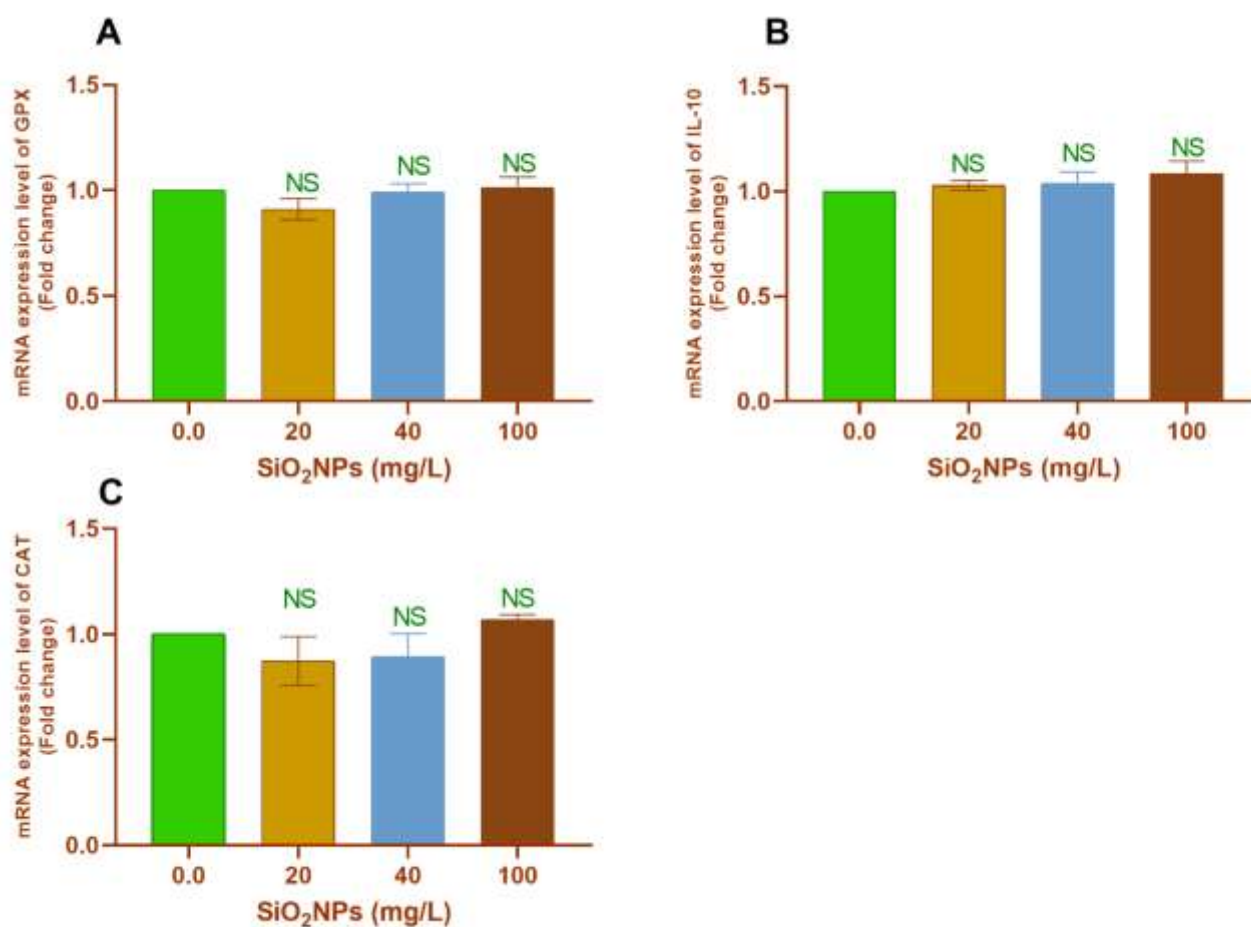

**Figure S1.** Transcription profile of (A) *GPX*, (B) *IL-10*, and (C) *CAT* genes in the gill tissues of Nile tilapia juveniles after exposure to different concentrations of SiO<sub>2</sub>NPs (0.0, 20, 40, and 100 mg/L) for 3 weeks. Values are expressed as mean  $\pm$  SEM ( $n = 9$ ). NS indicates non-significant differences.

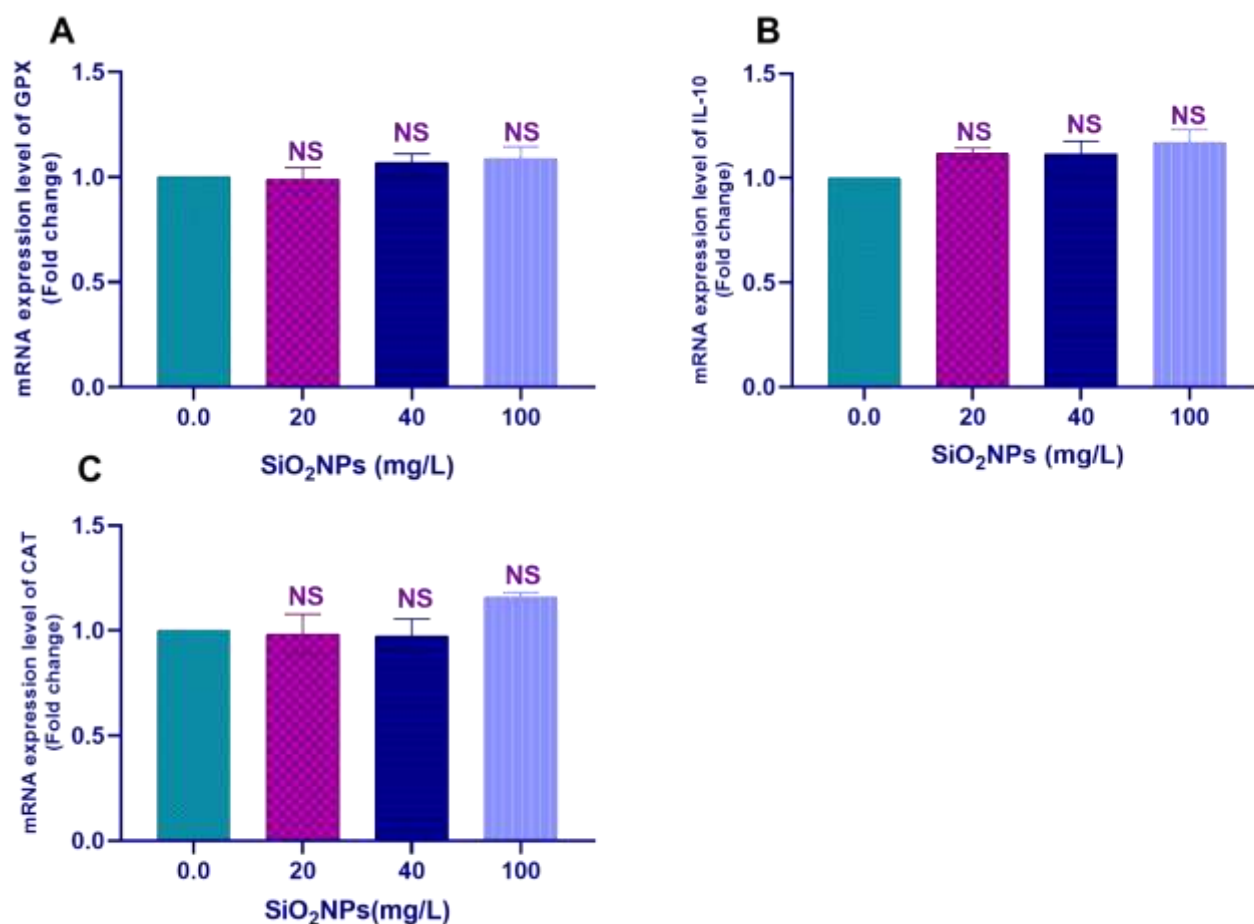

**Figure S2** Transcription profile of (A) *GPX*, (B) *IL-10*, and (C) *CAT* genes in liver of Nile tilapia juveniles after exposure to different concentrations of SiO<sub>2</sub>NPs (0.0, 20, 40, and 100 mg/L) for 3 weeks. Values are expressed as mean  $\pm$  SEM (n = 9). NS indicates non-significant differences.
